# Supplementary material
Source: publisher site journal article supplement (https://www.dovepress.com/article/503086)
Supplement: Supplementary file 1 [file get_supplementary_file.php]

**Supplemental Table 1: Interview Script**

| 1. Tell me about what you do? How did you come to be in your current role? |
| --- |
| 1. Why did you decide to be a [their position using their words] at [organization]? Have you ever thought about going elsewhere? Why or why not? |
| 1. What’s your relationship like with other [physicians/administrators] here at [organization]? What about with [other group] here? Can you give an example / Why is that / Can you tell me more about that? |
| 1. What do you think the problem is vs. Why do you think that works well? |
| 1. What could make those relationships better? What would an ideal physician-administration relationship look like? Can you give some examples? |
|  |

**Supplemental Table 2: Summary of Final Coding Structure**

| Cultural levels / complexity |
| --- |
| Organization-level |
| Department-level |
| Clinic/Practice-level |
| Shared interests |
| Altruism / service |
| Transparency |
| Follow through / actions speak louder than words |
| Intellectual honesty / openness / humility |
| Control / engagement / voice |
| Mutual respect / partner > boss |
| Clear responsibilities |
| Aligning incentives |
| Sincerity / caring about people |
| Connected / understands needs |
| The right environment / right people |
| Medical education |
| Operations |
| Common Barriers |
| Hazard of the common / espoused value vs artifacts |
| Physical barriers |
| Partner vs boss |
| Clinical leader vs island |
| Tribalism – us vs them |
| Professional identity |
| Specialty differences |
| Commitment to specialty/professional community |
| Commitment to organization |
| Power / success as climbing ranks |
| Commitment to education |
| Commitment to research |
| Drinking the Kool Aid (clinician-administrators) |
| Strategies for improvement |
| More clinician leadership |
| Other institution as model |
| Presence / walking in others’ shoes |
| Shared goals / identity |
| Sensemaking |
| Establishing trust |
| Time / being in state of transition |
